# Supplementary material
Source: PubMed Central journal article supplement (PMC6029537)
Supplement: 2017_185777-Disclosures_and_Contributions.pdf [file 2017_185777-Disclosures_and_Contributions.pdf]

Haematologica  
HAEMATOL/2017/185777  
Version 3

Anti-PD1 associated fulminant myocarditis after a single  
pembrolizumab dose: the role of occult pre-existing autoimmunity

Nicolas Martinez-Calle, Paula Rodriguez-Otero, Sara Villar, Luis  
Mejías, Ignacio Melero, Felipe Prosper, Patricia Marinello, Bruno Paiva,  
Miguel Idoate, and Jesus San-Miguel

Disclosures: Prof. Jesus San Miguel and Ignacio Melero have received honoraria from Merck & Co. The rest of the authors have nothing to disclose regarding this publication.

Contributions: SV reviewed the clinical case and performed the literature search. NM and PR reviewed the case and wrote the manuscript, these authors share first authorship. LM and MI were responsible for histology assessment and the autopsy of the patient. BP did the cytometry analysis of the pre and post-mortem samples. IM, FP, PM, BP AND JSM reviewed and corrected the manuscript.
